# Supplementary material for: Pitaya HpWRKY3 Is Associated with Fruit Sugar Accumulation by Transcriptionally Modulating Sucrose Metabolic Genes HpINV2 and HpSuSy1
Source: PubMed Central journal article supplement (PMC6514986; doi:10.3390/ijms20081890), 2019-04-17
Supplement: ijms-20-01890-s001.pdf [file ijms-20-01890-s001.pdf]

**Supplementary materials**

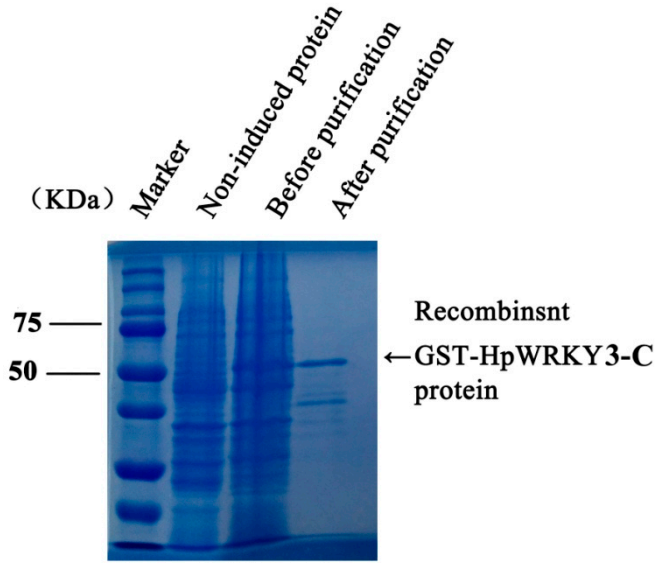

**Figure S1.** SDS-PAGE gel stained with Coomassie blue demonstrating affinity purification of the recombinant GST-WRKY3-C terminal.

**Table S1** Main regulatory motifs found within the *HpINV2* promoter

| Factor or site name | Signal sequence | Site                                                                                                                                                | Function                                                        |
|---------------------|-----------------|-----------------------------------------------------------------------------------------------------------------------------------------------------|-----------------------------------------------------------------|
| AE-box              | AGAAACTT        | 197(+)                                                                                                                                              | part of a module for light response                             |
| Box 4               | ATTAAT          | 720(+)                                                                                                                                              | part of a conserved DNA module involved in light responsiveness |
| CAAT-box            | CAAT            | 28(+),42(+),392(-),694(+),730(-),777(+),811(-),<br>1091(+),1099(-),1164(+)                                                                          | common cis-acting element in promoter and enhancer regions      |
|                     | CAAAT           | 163(+),391(-),399(-),470(+),668(-),1080(-),<br>1088(-),1208(-)                                                                                      |                                                                 |
|                     | CCAAT           | 1073(+), 1098(-)                                                                                                                                    |                                                                 |
| GC-motif            | CCCCCG          | 115(+)                                                                                                                                              | enhancer-like element involved in anoxic specific inducibility  |
| GCN4_motif          | TGAGTCA         | 1004(-)                                                                                                                                             | cis-regulatory element involved in endosperm expression         |
| Myb-binding site    | CAACAG          | 1011(-)                                                                                                                                             | MYB binding site                                                |
| MYC                 | CATTTG          | 1086(+),1208(+)                                                                                                                                     | MYC recognition elements                                        |
| TATA-box            | TACAAAA         | 191(-),366(-),445(-)                                                                                                                                | core promoter element around -30 of transcription start         |
|                     | TATA            | 293(-),303(-),330(-),341(-),375(-),399(-),409(-),<br>439(-),456(-),471(-),496(-),504(-),601(-),634(+),<br>690(+),741(+),795(+),800(+),831(+),933(+) |                                                                 |
|                     | TATTTAAA        | 101(+),559(-)                                                                                                                                       |                                                                 |
| TCT-motif           | TCTTAC          | 312(-),856(-)                                                                                                                                       | part of a light responsive element                              |
| W box               | TTGACC          | 1123(-)                                                                                                                                             | WRKY binding site                                               |
|                     | TTGACT          | 581(+)                                                                                                                                              |                                                                 |

**Table S2** Main regulatory motifs found within the *HpSuSy1* promoter

| Factor or site name | Signal sequence | Site                                                                                                                                            | Function                                                            |
|---------------------|-----------------|-------------------------------------------------------------------------------------------------------------------------------------------------|---------------------------------------------------------------------|
| ARE                 | AAACCA          | 186(-),809(+)                                                                                                                                   | cis-acting regulatory element essential for the anaerobic induction |
|                     |                 | 809(+)                                                                                                                                          |                                                                     |
| ATC-motif           | AGTAATCT        | 1095(-)                                                                                                                                         | part of a conserved DNA module involved in light responsiveness     |
| CAAT-box            | CAAT            | 68(-),72(-),206(+),424(+),494(-),921(-),1081(+),1151(-),<br>1174(+),1267(-),1269(+),1280(-),1374(-),1404(-),1415(-),<br>1468(-),1470(+),1562(-) | common cis-acting element in promoter and enhancer regions          |
|                     | CAAAT           | 160(-),263(+),517(+),601(-),643(-),673(+),678(+),734(+),<br>775(+),788(+),1263(+),1360(-),1390(-)                                               |                                                                     |
| CAT-box             | GCCACT          | 153(+),1305(-)                                                                                                                                  | cis-acting regulatory element related to meristem expression        |
| CGTCA-motif         | CGTCA           | 694(-)                                                                                                                                          | cis-acting regulatory element involved in the MeJA-responsiveness   |
| ERE                 | ATTTCATA        | 1231(-)                                                                                                                                         | Ethylene-responsive element                                         |
| GATA-motif          | AAGGATAAGG      | 703(-),1578(+)                                                                                                                                  | part of a light responsive element                                  |
| GC-motif            | CCCCCG          | 34(+)                                                                                                                                           | enhancer-like element involved in anoxic specific inducibility      |
| GT1-motif           | GGTTAA          | 394(+)                                                                                                                                          | light responsive element                                            |
| MBS                 | CAACTG          | 1488(-)                                                                                                                                         | MYB binding site involved in drought-inducibility                   |
| MYB                 | CAACCA          | 847(+)                                                                                                                                          | MYB binding site                                                    |
| MYC                 | CATTTG          | 161(+),734(-),788(-),1263(-),1269(+),1470(+)                                                                                                    | MYC recognition elements                                            |
| TATA-box            | TACAAAA         | 512(+),813(+),905(+),1479(+)                                                                                                                    | core promoter element around -30 of transcription start             |
|                     | TATA            | 89(-),279(-),332(-),352(-),504(-),531(-),542(-),577(-),<br>595(-),994(+),1028(+),1213(+),1440(+),1515(+),1594(+)                                |                                                                     |
| TCA-element         | CCATCTTTTT      | 762(-)                                                                                                                                          | cis-acting element involved in salicylic acid responsiveness        |
| TCT-motif           | TCTTAC          | 365(-)                                                                                                                                          | part of a light responsive element                                  |
| TGA-element         | AACGAC          | 940(+)                                                                                                                                          | auxin-responsive element                                            |
| W box               | TTGACC          | 1414(+)                                                                                                                                         | WRKY binding site                                                   |
|                     | TTGACT          | 1485(+),1403(+)                                                                                                                                 |                                                                     |
| WUN-motif           | AAATTTCT        | 1194(+)                                                                                                                                         | wound-responsive element                                            |

**Table S3** List of primers used in this study.

| Assay                                  | Primer sequence                                                                                                                                                                                                                                                                                                                                                                                                                                                                                                                                                                                                                                                                                                                                                                                                                                            | Restriction Site                                                                               |
|----------------------------------------|------------------------------------------------------------------------------------------------------------------------------------------------------------------------------------------------------------------------------------------------------------------------------------------------------------------------------------------------------------------------------------------------------------------------------------------------------------------------------------------------------------------------------------------------------------------------------------------------------------------------------------------------------------------------------------------------------------------------------------------------------------------------------------------------------------------------------------------------------------|------------------------------------------------------------------------------------------------|
| <b>RT-qPCR</b>                         | <i>HpINV1-qPCR-F</i> : TCAATCCTCGCCATCGAACTGC<br><i>HpINV1-qPCR-R</i> : GGACCAACGCCCCATTTTGTCA<br><i>HpINV2-qPCR-F</i> : ATGGTCCACTGTACCACAAGGG<br><i>HpINV2-qPCR-R</i> : GCCATCTGGCAAGATCGTAGC<br><i>HpSuSy1-qPCR-F</i> : AGGTATGTGGCTCAGGGGAAAAG<br><i>HpSuSy1-qPCR-R</i> : GCTATGGCAACGAAGGGAGG<br><i>HpSuSy2-qPCR-F</i> : ATAGGCAATGGGGTTGAGTTCC<br><i>HpSuSy2-qPCR-R</i> : TCAAGAGCCCTCAGGTTCTGAA<br><i>HpWRKY3-qPCR-F</i> : CCTTTATCTCTGAGTCAACGCC<br><i>HpWRKY3-qPCR-R</i> : ACAATCATGGAAGAAGGCTGTG                                                                                                                                                                                                                                                                                                                                                 |                                                                                                |
| <b>Promoter and Gene isolation</b>     | <i>HpINV2 PRO-SP1</i> : TTGCAGCATATCATTTGTCCAAGCAAACCTC<br><i>HpINV2 PRO-SP2</i> : CCGCCGGAGACTCCCTGCCGTCTAGGATGA<br><i>HpINV2 PRO-SP3</i> : GTTGGGCTGGGTCGATNNNNNNNNCCGTGG<br><i>HpSuSy1 PRO-SP1</i> : CTATGGCAACGAAGGGAGGACGACGATTG<br><i>HpSuSy1 PRO-SP2</i> : TCATCGCGATCACCTTTTCAAGTTCATCAAT<br><i>HpSuSy1 PRO-SP3</i> : ACGATGAGCAGAGAGAGNNNNNNNNCTTTCT<br><i>HpINV2 PRO-F</i> : AGTTGTTTGGAGTTGGAGAGGG<br><i>HpINV2 PRO-R</i> : CATTGAGGAAGAGAAGATTTTGTGT<br><i>HpSuSy1 PRO-F</i> : ATATAACTTTGTCTGAGAAGGAAAAGGG<br><i>HpSuSy1 PRO-R</i> : CATTGGAGATGGACGGTTCTAGA<br><i>HpWRKY3-F</i> : ATGCCGAAAAACGATGCCGTG<br><i>HpWRKY3-R</i> : CTATGTTATCTCTCTGTGTTTAAATGGAG                                                                                                                                                                                  |                                                                                                |
| <b>Yeast One Hybrid</b>                | <i>HpINV2 PRO-pAbAi-F</i> : AATTGAAAAGCTTGAATTCGAGCTCCCTTCTGCTCAACGAATTTTACAAGGTCAA<br><i>HpINV2 PRO-pAbAi-R</i> : ACAGAGCACATGCCCTCGAGGTCGACAATTTTAAAGAGTTGTATTCGATTT<br><i>HpSuSy1 PRO-pAbAi-F</i> : AATTGAAAAGCTTGAATTCGAGCTCAATATACTAATGATAAATAGAAAACTATC<br><i>HpSuSy1 PRO-pAbAi-R</i> : ACAGAGCACATGCCCTCGAGGTCGACCAATGGCAAAGAAAAGTGCTGTTAGAGGTT<br><i>HpWRKY3-pGADT7-F</i> : GGAGGCCAGTGAATTCATGCCGAAAAACGATGCCGTG<br><i>HpWRKY3-pGADT7-R</i> : CGAGCTCGATGGATCCCTATGTTATCTCTCTGTTTAAATGGAG                                                                                                                                                                                                                                                                                                                                                         | <i>Sac I</i><br><i>Sal I</i><br><i>Sac I</i><br><i>Sal I</i><br><i>EcoR I</i><br><i>BamH I</i> |
| <b>EMSA</b>                            | <i>HpWRKY3-C-pGEX-F</i> : GGTTCGCGTGGATCCATGCCAGCTGATGATGGCTATAATGGAGG<br><i>HpWRKY3-C-pGEX-R</i> : AGTCACGATGCGGCCGCTGTATTCTCTCTGTTTAAATGGAG<br><i>HpINV2 PRO-Probe-F</i> : ACAAGGTCAAACCCATAAATTTAATTTGGGGCAATTTGGTCAATTTG<br><i>HpINV2 PRO-Probe-R</i> : CAAATGACCAAATGCCCCCAATTAATAATTTAGGGTTTGACCTTGT<br><i>HpINV2 PRO-Probe-Mutant-R</i> : ACAAAAAAAAAACCCATAAATTTAATTTGGGGCAATTTGGTCAATTTG<br><i>HpINV2 PRO-Probe-Mutant-R</i> : CAAATGACCAAATGCCCCCAATTAATAATTTAGGGTTTTTTTTTTGT<br><i>HpSuSy1 PRO-Probe-F</i> : GCACTGTGTTTATGATAATTGACCCGTTAATGACTGCCAAAAATTTGAATTTT<br><i>HpSuSy1 PRO-Probe-R</i> : AAAATTCAAATTTTGGCAGTCAATAACGGGTCAATATCATAAACACAGTGC<br><i>HpSuSy1 PR -Probe-Mutant-F</i> : GCACTGTGTTTATGATAAAAAAAAAACGTTAAAAAAGCCAAAAATTTGAATTTT<br><i>HpSuSy1 PRO-Probe-Mutant-R</i> : AAAATTCAAATTTTGGCTTTTTTAAACGTTTTTTTATCATAAACACAGTGC | <i>BamH I</i><br><i>Not I</i>                                                                  |
| <b>Subcellular localization</b>        | <i>HpWRKY3-pEAQGF-F</i> : CAAATTCGCGACCGGTATGCCGAAAAACGATGCCGTG<br><i>HpWRKY3-pEAQGF-R</i> : TGCTAGTCATACCCGGTTGTTATCTCTCTGTTTAAAT                                                                                                                                                                                                                                                                                                                                                                                                                                                                                                                                                                                                                                                                                                                         | <i>Age I</i><br><i>Age I</i>                                                                   |
| <b>Trans-activation Activity Assay</b> | <i>HpWRKY3-pGBKT7-F</i> : GCCATGGAGGCCGAATTCATGCCGAAAAACGATGCCGTG<br><i>HpWRKY3-pGBKT7-R</i> : GGCCGCTGCAGGTCGACGCTATGTTATCTCTCTGTTTAAATGGAG<br><i>HpWRKY3-pBD-F</i> : TCGCCGACCGGTAGGCCCTATGCCGAAAAACGATGCCGTG<br><i>HpWRKY3-pBD-R</i> : ACCCAGAGTAAAGGCCCTCTATGTTATCTCTCTGTTTAAATGGAG                                                                                                                                                                                                                                                                                                                                                                                                                                                                                                                                                                    | <i>EcoR I</i><br><i>Sal I</i><br><i>Stu I</i><br><i>Stu I</i>                                  |
| <b>Transient expression</b>            | <i>HpINV2 PRO-LUCReporter-F</i> : TATAGGGCGAATTTGGGTACAGTTGTTGGAGTTGGAGAGGG<br><i>HpINV2 PRO-LUCReporter-R</i> : TTGGCGTCTCCATGGTGAGGAAGAGAAGATTTTGTGT<br><i>HpSuSy1 PRO-LUCReporter-F</i> : TATAGGGCGAATTTGGGTACCATATACTTTGTCTGAGAAGGAAAAGGG<br><i>HpSuSy1 PRO-LUCReporter-R</i> : TTGGCGTCTCCATGGTGAGATGGACGGTTCTAGAGAAC<br><i>HpWRKY3-pEAQ-F</i> : CAAATTCGCGACCGGTATGCCGAAAAACGATGCCGTG<br><i>HpWRKY3-pEAQ-R</i> : AGTTAAAGGCCTCGAGCTATGTTATCTCTCTGTTTAAATGGAG                                                                                                                                                                                                                                                                                                                                                                                         | <i>Kpn I</i><br><i>Nco I</i><br><i>Kpn I</i><br><i>Nco I</i><br><i>Age I</i><br><i>Xho I</i>   |

**Text 1.** Nucleotide sequences of *HpINV2* and *HpSuSy1* promoters. W-box motif were underlined. The probe nucleotide sequence used in EMSA assay is indicated in bold. Translation start site (ATG) was shown in yellow.

>*HpINV2*

AGTTGTTTGGAGTTGGAGAGGGTTCTTGAGGTTGAAAGAGAGAGAGCATTGTTGAGAAAGA  
ATGAGTCCAAACAGTAAACCTCAAAGTAGGCAATTCTACTTAAATATTCTTCCTTCTGCTCAAC  
GAATTTT**ACAAGGTCAAACCCTAAAATTTAATTGGGGGCAATTTGGTCATTTGCCTTTCTCC**  
AATAATTTTTCCCACTTACTTTTTCTCCAAAAGCAACACCAAATGAATTAGTTGCATACCTGTT  
GATGACTCACTTACCAGTAAATTTCTTAAATTAAGGGTCTGTTCTATTTTCGCGTTTTAGATAGAT  
AGATAGATATAAGGAGATGTAAGGAACCTTAAAGAAGCTGTAAGAGATGTAAGGAGATGTAAG  
GAGCTGTAAGGAAATGTAAGAAGATGTAAGGAGCTGTAAGGATAAATATAAGGAGTTGTTGAA  
TTGTAGATGAGTTGTATAGTATAATTTATTTTACAATGAACGTTTTGGATGAAAAATAAATATG  
AAAATAATATACTTATTGAAAATAAATAATTAATTAAGTTAATTACACAACAATAAAATATAATAA  
TCCCATAAATTTGGTGAATAAGATTTTCGTCCACTTGAGGTGATTTTTTATATGAACATTAGTTTG  
ATCGAATAAGCAAAGTATAATAAAATTTTTTTTTTTT**TGACT**AAATCGAATACAACCTCTTAAATA  
AATTCCTATTTTCAGTAAATAATAATAAAAATAAATGTATGCTCATCTATAAATATATATTTTTATG  
TCGAAACTCAAATATAATTTACGGCGTTATATTATGTTTTATGTATATGTAATGTCTTGTTCATA  
AGATATTTATAAATTTGTATATTGGTAGTATCATAAAAAATATACATATTTTTGTAACATAAAATAA  
ATAAATGCTATAGAAAATCTATAAGATGTAAGGAGATGTAAGAAAATATAATAAAATATAAAAAA  
CTGTAATAAAATGTAACCTCTTAACTAAATTCTAAAAAATGCAAAATAGAACCGGAGCTAGA  
CACTTTTCTTAAAAAAAAGAGAGAGAACTTTTGTACACACTCGTGCATCTACCAGCCAAAT  
CCAGAGTTGCCACCTCCACTAACCCCAAGCCGAGCACCCCCCCCCCGCGCCTCTCTATTTAA  
ACCCATTCTTTCTCCTCCCTCCTCCCTCCTCCCTCCTCCCTCCATTCTCAATCTCAACCTCAACC  
TCAATCAACACAAAACCTCTTCTCTCCTCA**ATG**

>*HpSuSy1*

ATATACTTTGTCTGAGAAGGAAAAGGGTACGCATTGTTAGAACTAGTTATGATCGATGATGTG  
GACGCCCTAAACTAATATACTAATGATAAATAGAAAATATCAG**TGACT**TACAAAATGCAAT  
TGTTGTGATGTTGAAATATTAAGGTTATAAAAA**GCACTGTGTTTATGATAATTGACCCGTTAT**  
**TGACTGCCAAAAATTTGAATTTTGGGTTATTGGATGAGAATAATTTGAGCTTTAAAAATAGATT**  
TCAGTGTTTCGAACTTTGCGGATATTTATTTTCAGTGGCCAATATCATTTTAGATCGTATTGTTTT  
AGGCAATTGCAAATGATATTACCCGTAAAGCAACACAAAGATATGAAATTAAGTTACCTATAC  
TCATTTTGAAGTTTAAATTTCTTAAAAAAAATACAATCTAAAATGATATTTAGACTATTGAAAA  
AATAAATACCGCAAAAAGTTCAAGATGCTAAAAGTTATTTTTAAATTTTAGATTACTCCCGTTCAA  
TACCTTCAAAGTTCAGATTCTGCACATCCGATTATCCTAATTAACCTACTATAATTTTTTTTAGA  
ATATCTCGCGATCATAATTATATAATAAAATAAAGCATCTTCATAAATAAATAATTATTCATAACTAA  
CCTCTAACGACACTTTTTCTTGCCATTGTAGAATGCGATGTACAAAATAGTTTCCTTCCCATAAT  
CAAAGGCAAGAAAAGCAAACCGTCCCCCCCCCAACCACAAAAAATAAAAAATCGGGGAC  
AAAAGTACAAAACCATGAAATTAACGGCGACAAATGTACCCATCAAATCAAACCTGAAAAAGA  
TAGCCTTTGAATCTAATTAGCCAAATGGAAAATGCGTACTATGACACTAATACATTATCCTTGAC  
GTATCAGACTTGCAAATCAAATTTCTCCCTACTAACAAGGAAGAGAATTTGATACTAAAGCCA  
AACTGTTTATTTTAAAGTTTGAATAATTTGATATATTAATTTTTATGATTATAATTTTTAAATTTACT

TTTAAGCATCATTACTTATATATTTTTTATAATTTAGTTCTCAAATTACAAAAGTATATTTATTATTG  
TCATTTTTGTTTTTTTCTTTAAAACAAAACTCTAAAAATCATCTTTTCGTTATTAGATAATTTATC  
ATAATGTTGTGGGTACTTAAAAAAGAGAGGTTAATTTTTTTTTTAAACATGAATAGTAGTAAGAA  
TATTTTTATAATTCTAAAGCTAAATTTATAAAAAATTCATAAATAAAGTATTTAATAATAAATTTAA  
AAATATTA AAACTATAAAATTAATGTATCAAATTTTTGTGGTAACTAAAAGTTAATAGTTATGCCA  
AAACCCACACGACGCTTTTCAATGTGCTCATATTCCTGTGGTTTCCCAGCGGCAAGGCCCCCC  
CATTTGGTGCCACTTGTTCTGGTGGTATTTTACCACCACTCACCTTTCGCAGTTCCAATTTCTC  
TCTCCTTTATATACCCCTCTCTTATTGATTGTTCTTCGCTTGGCTCTACTACTTTCTTCTCCCCC  
GACCTCGTTCTCTAGAACCGTCCATCTCCAATG

**Text 2.** Sequence of HpWRKY3.

>*HpWRKY3*

ATGCCGAAAACGATGCCGTGACTTCCACGAAACCGCCGCCGGCGCCGCGGATGGCGGTGGG  
GCAGCTGCAGCCACCGACTATTACACTGCCGCCGCGTGGTGGGGTCGACTCCATTTTTCTGGG  
TCCGGGTTCGGAGCTAGCCCAGGCCCGATGACCCTGGTCTCCAGCTTCTTCTCTGAGAATGAC  
CCGATTCTGATTGTCGTTCTTTCTCTCAGCTCTTAGCTGGCGCCATGGCGTCTCCCCGACCGG  
CTTCCGAGAACAGCTCTAGTGAACCGGACCATCTCCGGTTCAGGCAGAGCAGGCCGGCCGGT  
CTGGTGGTTTCTCAGCAGCAAGGGGTTTTACCATTCCGCCCGGGCTTAGTCCTGCTAGCTTGC  
TCGATTCTCCTGGTTTATTCCCTGGTCAGGGGCCATTTGGGATGTCTCACCAGCAAGCGCTAGC  
TCAAGTTACGGCTCAAGCTGTACAAGCACAAGCTAACTGTCATGTGCAAGGCAATTTTCCATCT  
TCCCTCGGTATAGGTCTTCCGGGATCATCTCCATTTCCAGCCTTTATCTCTGAGTCAATGCCACA  
AAATGTGACAAGTTCTGCCCTAGATTCTACCGAGATAAAAGAACCGGCACAGTACTCTGGCAT  
GGACCAAAGATCACAGCCTTCTTCCATGATTGTTGATAAGCCAGCTGATGATGGCTATAATTGG  
AGGAAATATGGGCAGAAGCAAGTTAAAGGGAGTGAATTTCCCCGAAGTTATTACAAATGTACA  
CACATTAATTGCCCTGTCAAGAAGAAGGTGGAGCGTTCTCTTGATGGCCAAGTGACCGAGATA  
ATCTATAAGGGCCAGCACAATCATCCGCCACCACAAAACGTTCTAAAGAGAGCGGAAATTCT  
AATGGAACTTGGGAAGTCAAGGAAACCCTGAATTAACATGAATAGCACGAATGAGGGCATG  
ACTTACTCATTGTCTAGAAGGGATCAGGAATCTAGCCAAGCTACAGCAGAGCATTGTCTAGTG  
ATGAGGAGGAAGTGGGCAATGATGAACTAGAGAATCTGAGGATGAACCTGATGCCAAGAGA  
AGGAACACAGAACTCCGGGTACCAGAGCAAGCTGTTTCACATAGGACAGTCACTGAACCCAA  
GATTATTGTTCAAACA ACTAGTGAAGTTGATCTTTTGGACGATGGTTATAGGTGGCGCAAGTAT  
GGACAAAAAGTTGTCAAAGGAAATTCATATCCGAGGAGCTATTACAAATGCACTCACCCAGGG  
TGTAATGTTTCGTAAGCATATTGAGCGGGCAGCCTCAGACCCTAAAGCAGTGATAACAACATACG  
AGGGGAAGCACAGTCACGATGTTCCAGCTGCTAAGACGAGCAGCCATAACACATCCAACAGC  
AGCTTTTCACAGCCAAGACCGCCTAGTTTGGCAGCGAATAATAACTCCTATGTTGGGAAGACG  
GATTTTACAAGTAATCAACAGCCTGTAGCCCTTCTCCATTTAAAACAAGAGAGAATAACATAG
